# Supplementary material for: Water stability of self-assembled peptide nanostructures for sequential formation of two-dimensional interstitial patterns on layered materials
Source: Royal Society of Chemistry journal article supplement (doi:10.1039/c6ra21244a), 2016-01-01
Supplement: c6ra21244a1.pdf [file c6ra21244a1.pdf]

Journal Name

ARTICLE

### Support information

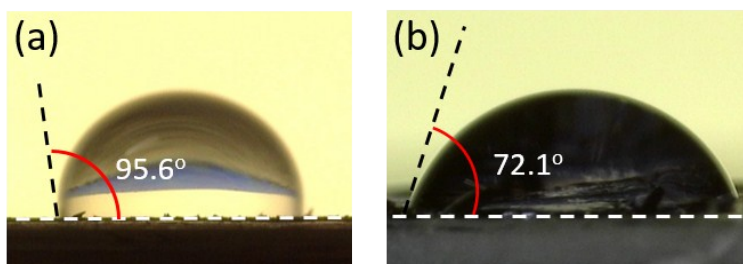

Fig. S1. Contact angle measurements of water droplets on (a) graphite and (b) MoS<sub>2</sub> substrates.

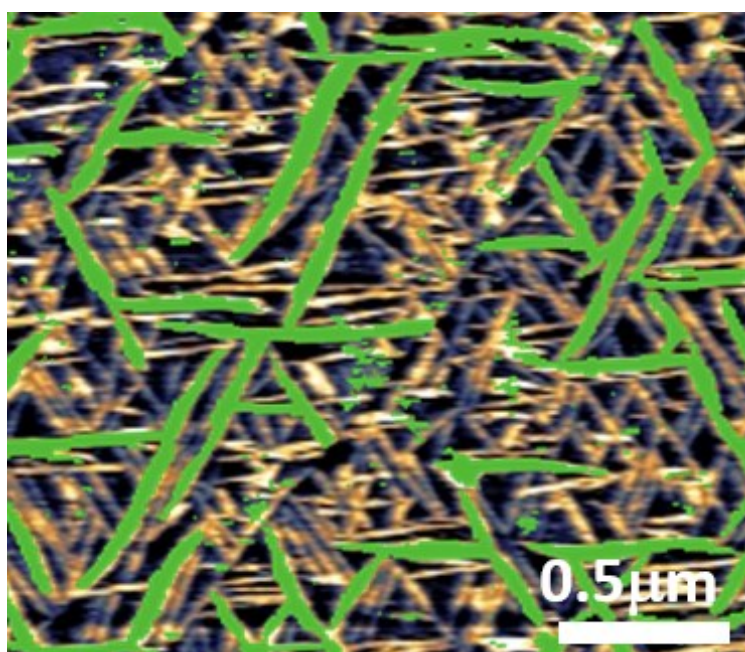

Fig. S2. Overlaying image of LEY peptide nanostructures on graphite indicated with green color. The bottom image is the AFM image of Fig. 6.
